# Supplementary material for: Highly enhanced response of MoS2/porous silicon nanowire heterojunctions to NO2 at room temperature
Source: Royal Society of Chemistry journal article supplement (doi:10.1039/c7ra13484c), 2018-01-01
Supplement: c7ra13484c1.pdf [file c7ra13484c1.pdf]

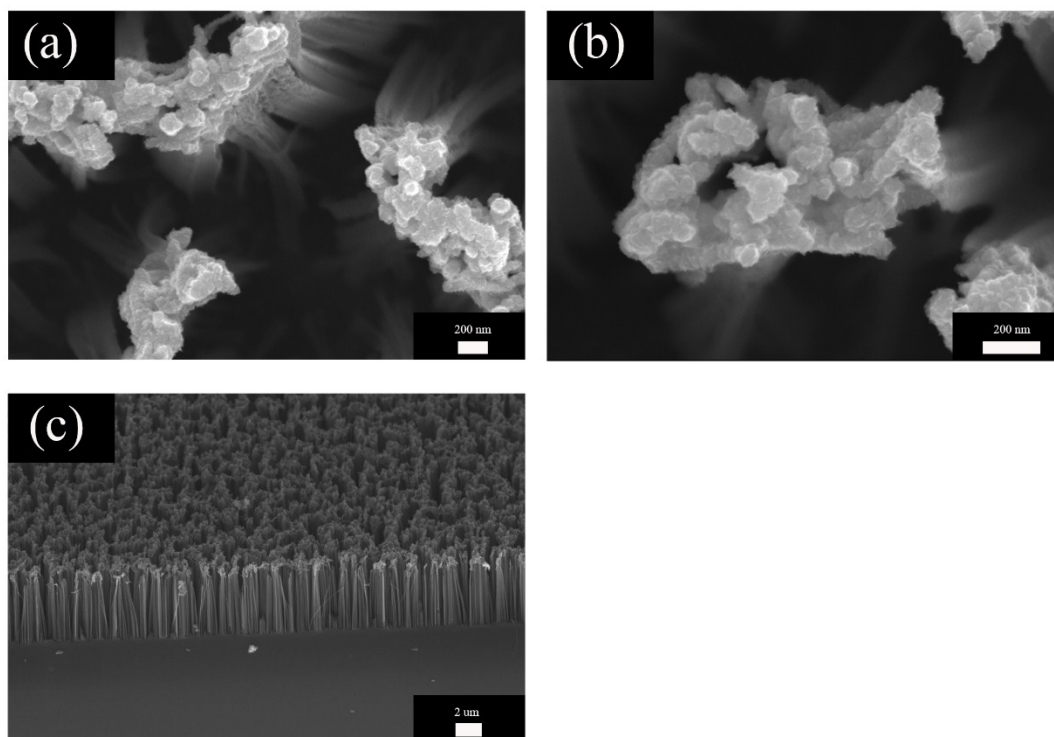

Figure 1. SEM images of MoS<sub>2</sub>/PSiNWs-3 min with deposition temperature of 720 °C. Side view (a) and top view (b), (c).

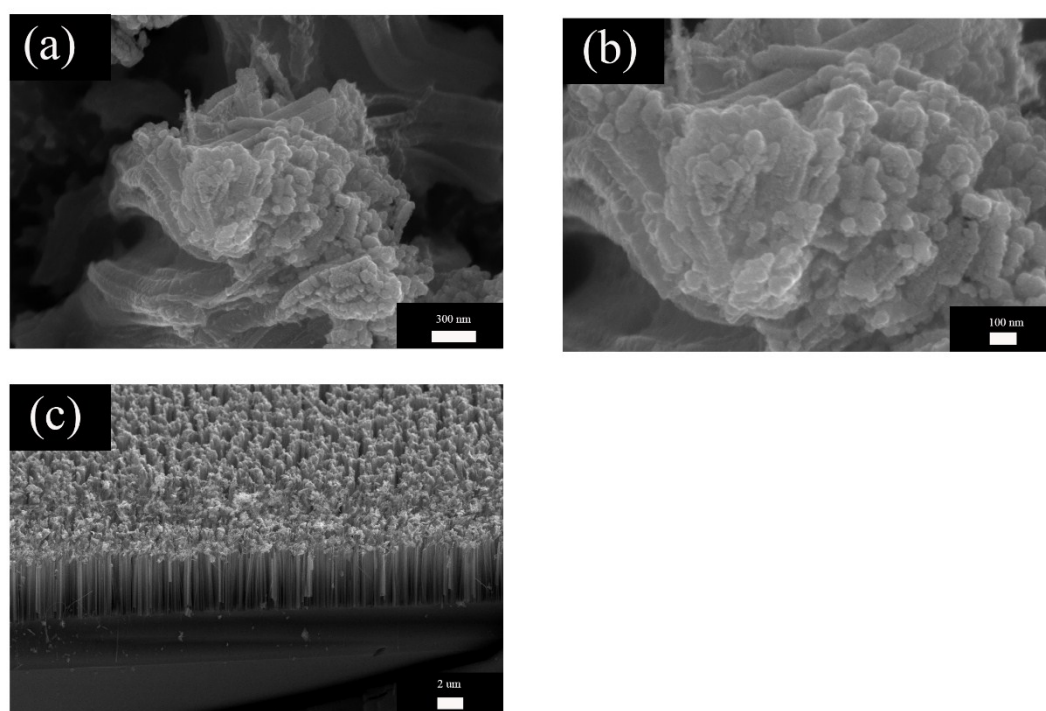

Figure 2. SEM images of MoS<sub>2</sub>/PSiNWs-3 min with deposition temperature of 820 °C. Side view (a) and top view (b), (c).
